# Supplementary material
Source: PubMed Central journal article supplement (PMC7014827)
Supplement: NIHMS1069286-supplement-Supp_figS2.pdf [file NIHMS1069286-supplement-Supp_figS2.pdf]

# Phosphosite T15

MS/MS Fragmentation of **HHTEDTDENTQAAEIER**

Found in **AT2G26300.1|PACid:19640861** in **At\_TAIR10\_crap**, G-protein alpha subunit, putative, expressed

Match to Query 4300: 2074.878972 from(692.633600,3+) rtinseconds(953) index(297)

Title: Locus:1.1.1.2500.5 File:"20170907\_Haiyun\_enriched.wiff"

Data file \\ad.unc.edu\cas\chemistry\share\Chem\_HicksGroup\Lab\_Members\Emily\2017 experiments\September

2017Jones\20170907\_Haiyun\_enriched.mgf

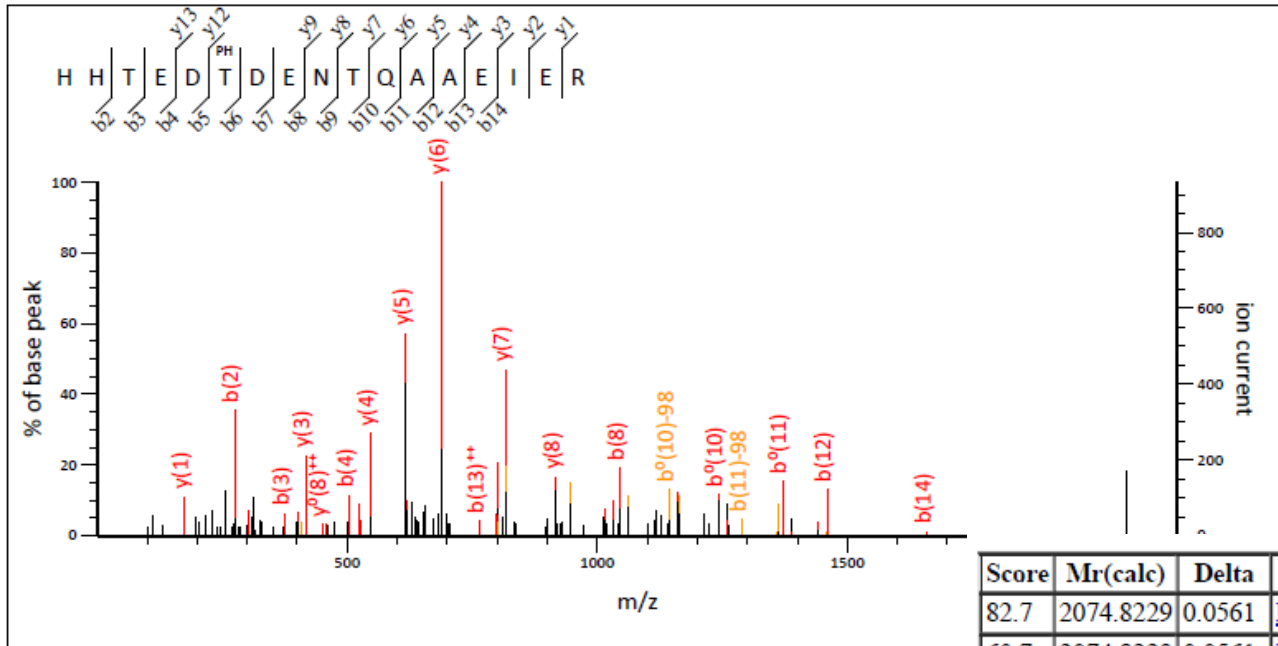

| Score | Mr(calc)  | Delta   | Sequence                             | Site Analysis     |
|-------|-----------|---------|--------------------------------------|-------------------|
| 82.7  | 2074.8229 | 0.0561  | <a href="#">HHTEDTDENTQAAEIER</a>    | Phospho T6 99.36% |
| 60.7  | 2074.8229 | 0.0561  | <a href="#">HHTEDTDENTQAAEIER</a>    | Phospho T3 0.63%  |
| 44.1  | 2074.8229 | 0.0561  | <a href="#">HHTEDTDENTQAAEIER</a>    | Phospho T10 0.01% |
| 6.5   | 2074.9602 | -0.0812 | <a href="#">FLPDAAALAAVTSAAASQRR</a> |                   |
| 3.6   | 2074.7956 | 0.0834  | <a href="#">ADSCLTGTDTGVSFLER</a>    |                   |
| 3.6   | 2074.7956 | 0.0834  | <a href="#">ADSCLTGTDTGVSFLER</a>    |                   |
| 3.6   | 2074.7956 | 0.0834  | <a href="#">ADSCLTGTDTGVSFLER</a>    |                   |
| 3.6   | 2074.7956 | 0.0834  | <a href="#">ADSCLTGTDTGVSFLER</a>    |                   |
| 3.5   | 2074.9295 | -0.0506 | <a href="#">EQSDFHLGSKMLYERR</a>     |                   |
| 3.4   | 2074.8579 | 0.0210  | <a href="#">MNMSLLQTPSLLMYNK</a>     |                   |

# Phosphosite T19

MS/MS Fragmentation of **HHTEDTDENTQAAEIER**

Found in **AT2G26300.1|PACid:19640861** in **At\_TAIR10\_crap**, G-protein alpha subunit, putative, expressed

Match to Query 4301: 2074.880652 from(692.634160,3+) rtinseconds(940) index(276)

Title: Locus:1.1.1.2494.5 File:"20170907\_Haiyun\_enriched.wiff"

Data file \\ad.unc.edu\cas\chemistry\share\Chem\_HicksGroup\Lab\_Members\Emily\2017 experiments\September

2017\Jones\20170907\_Haiyun\_enriched.mgf

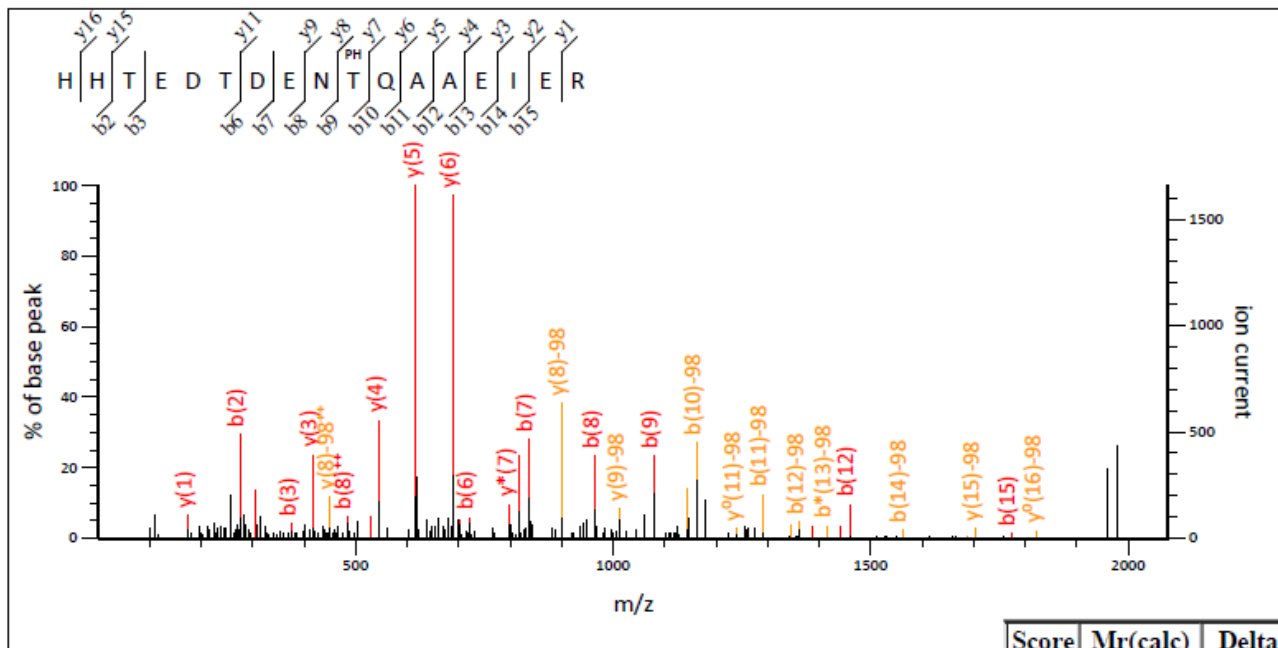

| Score | Mr(calc)  | Delta   | Sequence                             | Site Analysis      |
|-------|-----------|---------|--------------------------------------|--------------------|
| 77.9  | 2074.8229 | 0.0578  | <a href="#">HHTEDTDENTQAAEIER</a>    | Phospho T10 99.02% |
| 57.8  | 2074.8229 | 0.0578  | <a href="#">HHTEDTDENTQAAEIER</a>    | Phospho T6 0.97%   |
| 38.1  | 2074.8229 | 0.0578  | <a href="#">HHTEDTDENTQAAEIER</a>    | Phospho T3 0.01%   |
| 5.0   | 2074.7956 | 0.0851  | <a href="#">TSDTLIQTGYASDCQOK</a>    |                    |
| 5.0   | 2074.7956 | 0.0851  | <a href="#">TSDTLIQTGYASDCQOK</a>    |                    |
| 3.8   | 2074.9126 | -0.0319 | <a href="#">DHKIQETFSLDGKIER</a>     |                    |
| 3.7   | 2074.8892 | -0.0085 | <a href="#">QGSPPPAATDHSPTSRTMSR</a> |                    |
| 3.4   | 2074.9010 | -0.0204 | <a href="#">EKGSYYWVHGRDNITNR</a>    |                    |
| 2.3   | 2074.8237 | 0.0570  | <a href="#">LDPARPTVMESFLTNR</a>     |                    |
| 2.3   | 2074.9198 | -0.0391 | <a href="#">DSORGIVEQAKSOSLNR</a>    |                    |

# Phosphosite S109

MS/MS Fragmentation of **YMLSSESIAGEK**

Found in **AT2G26300.1|PACid:19640861** in **At\_TAIR10\_crap**, G-protein alpha subunit, putative, expressed

Match to Query 1866: 1506.724188 from(754.369370,2+) rtinseconds(1527) index(3266)

Title: Locus:1.1.1.2747.8 File:"20170907\_Haiyun\_enriched.wiff"

Data file \\ad.unc.edu\cas\chemistry\share\Chem\_HicksGroup\Lab\_Members\Emily\2017 experiments\September 2017\Jones\20170907\_Haiyun\_enriched.mgf

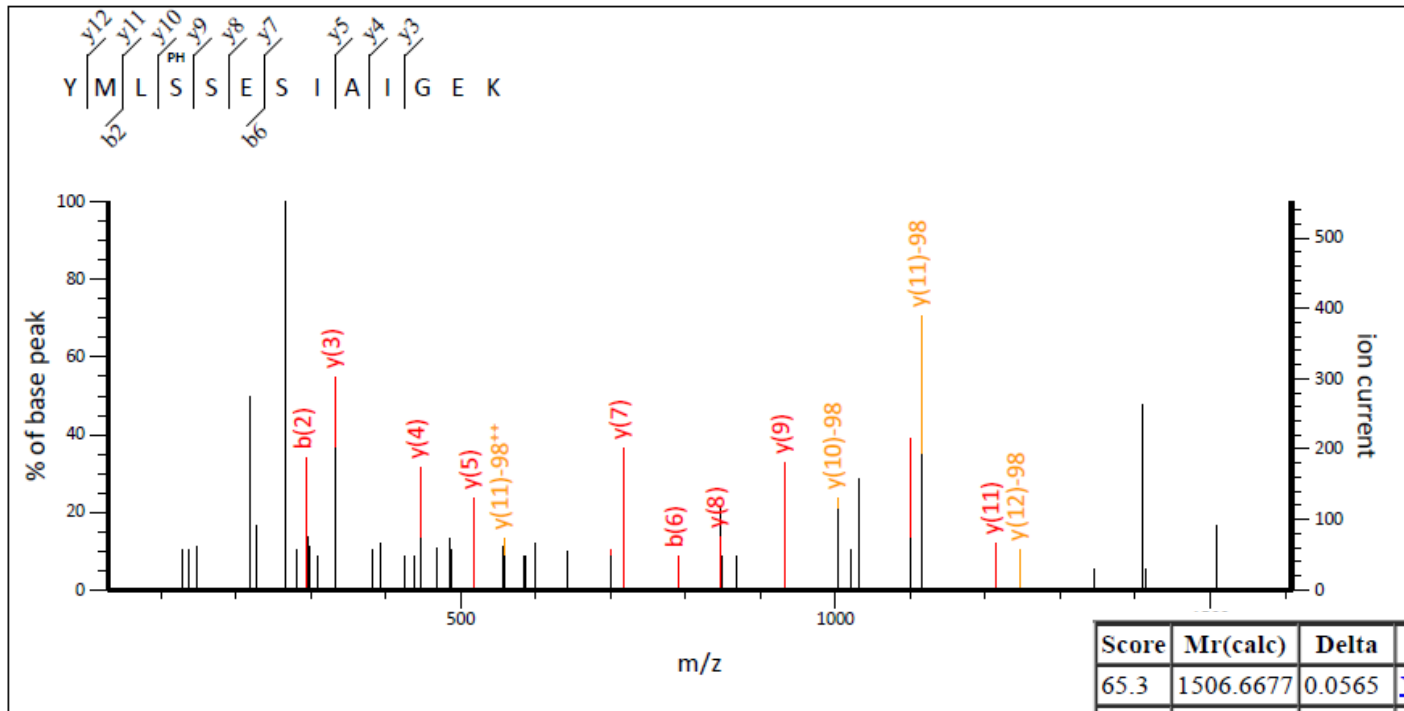

| Score | Mr(calc)  | Delta   | Sequence                      | Site Analysis     |
|-------|-----------|---------|-------------------------------|-------------------|
| 65.3  | 1506.6677 | 0.0565  | <a href="#">YMLSSESIAGEK</a>  | Phospho S4 95.97% |
| 51.5  | 1506.6677 | 0.0565  | <a href="#">YMLSSESIAGEK</a>  | Phospho S5 3.99%  |
| 32.7  | 1506.6677 | 0.0565  | <a href="#">YMLSSESIAGEK</a>  |                   |
| 31.3  | 1506.6677 | 0.0565  | <a href="#">YMLSSESIAGEK</a>  | Phospho S7 0.04%  |
| 8.4   | 1506.6724 | 0.0518  | <a href="#">MFLVGLGRSMR</a>   |                   |
| 7.2   | 1506.7443 | -0.0201 | <a href="#">TLLNESKTHASVK</a> |                   |
| 4.9   | 1506.7599 | -0.0357 | <a href="#">SDKIMSEISELOK</a> |                   |
| 4.4   | 1506.6976 | 0.0266  | <a href="#">MGIYGVMTGKKGK</a> |                   |
| 0.6   | 1506.7847 | -0.0605 | <a href="#">TLPSYLGHLVSLK</a> |                   |

# Phosphosite S112

MS/MS Fragmentation of **YMLSESIAIGEK**

Found in **AT2G26300.1|PACid:19640861** in **At\_TAIR10\_crap**, G-protein alpha subunit, putative, expressed

Match to Query 1867: 1506.728708 from(754.371630,2+) rtinseconds(1466) index(2882)

Title: Locus:1.1.1.2721.12 File:"20170907\_Haiyun\_enriched.wiff"

Data file \\ad.unc.edu\cas\chemistry\share\Chem\_HicksGroup\Lab\_Members\Emily\2017 experiments\September 2017\Jones\20170907\_Haiyun\_enriched.mgf

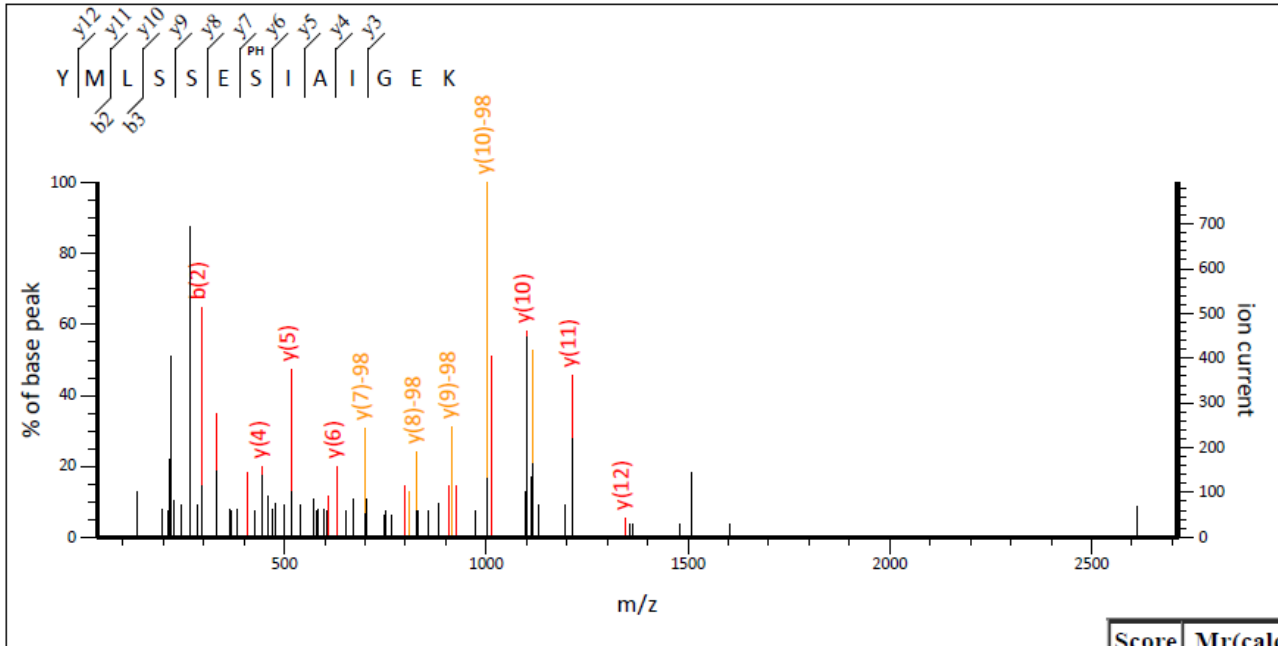

| Score | Mr(calc)  | Delta   | Sequence                       | Site Analysis     |
|-------|-----------|---------|--------------------------------|-------------------|
| 72.8  | 1506.6677 | 0.0610  | <a href="#">YMLSESIAIGEK</a>   | Phospho S7 99.78% |
| 45.9  | 1506.6677 | 0.0610  | <a href="#">YMLSESIAIGEK</a>   | Phospho S5 0.21%  |
| 35.1  | 1506.6677 | 0.0610  | <a href="#">YMLSESIAIGEK</a>   | Phospho S4 0.02%  |
| 6.8   | 1506.7976 | -0.0689 | <a href="#">MFLKAAAEELARDR</a> |                   |
| 5.4   | 1506.6677 | 0.0610  | <a href="#">YMLSESIAIGEK</a>   |                   |
| 5.0   | 1506.7725 | -0.0438 | <a href="#">VGGFRNVGKSMPSR</a> |                   |
| 3.9   | 1506.7752 | -0.0465 | <a href="#">SQLLSPPMAVFSK</a>  |                   |
| 1.9   | 1506.6724 | 0.0563  | <a href="#">MFLVGELGRSMR</a>   |                   |
| 1.1   | 1506.6976 | 0.0312  | <a href="#">MGIYGVMTGKKGK</a>  |                   |
| 0.1   | 1506.7323 | -0.0036 | <a href="#">MMISTNLPHYLR</a>   |                   |

# Phosphosite S314 or S315

MS/MS Fragmentation of **DYQPVSSGKQEIEHAYEFVK**

Found in **AT2G26300.1|PACid:19640861** in **At\_TAIR10\_crap**, G-protein alpha subunit, putative, expressed

Match to Query 5495: 2433.195522 from(812.072450,3+) rtinseconds(1511) index(3152)

Title: Locus:1.1.1.2740.15 File:"20170907\_Haiyun\_enriched.wiff"

Data file \\ad.unc.edu\cas\chemistry\share\Chem\_HicksGroup\Lab\_Members\Emily\2017 experiments\September 2017\Jones\20170907\_Haiyun\_enriched.mgf

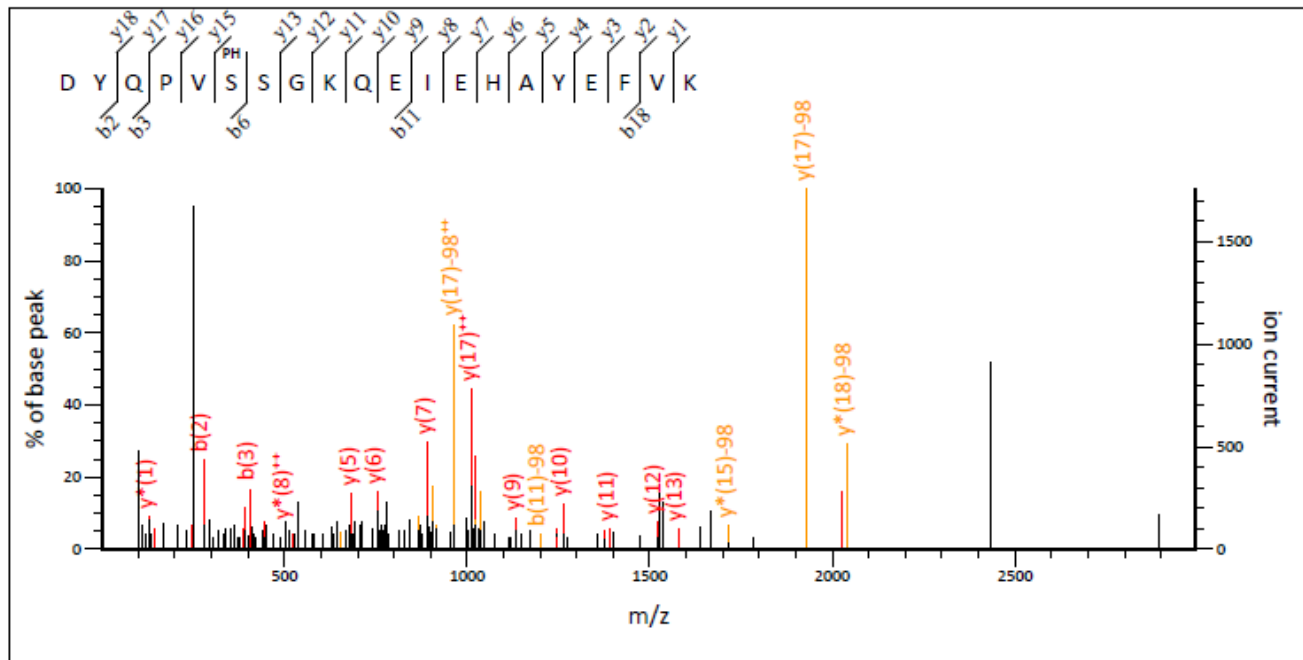

| Score | Mr(calc)  | Delta  | Sequence                             | Site Analysis     |
|-------|-----------|--------|--------------------------------------|-------------------|
| 50.2  | 2433.0889 | 0.1066 | <a href="#">DYQPVSSGKQEIEHAYEFVK</a> | Phospho S6 54.78% |
| 49.3  | 2433.0889 | 0.1066 | <a href="#">DYQPVSSGKQEIEHAYEFVK</a> | Phospho S7 44.32% |
| 30.4  | 2433.0889 | 0.1066 | <a href="#">DYQPVSSGKQEIEHAYEFVK</a> |                   |

# Phosphosite S314 or S315

MS/MS Fragmentation of **DYQPVSSGKQEIEHAYEFVK**

Found in **AT2G26300.1|PACid:19640861** in **At\_TAIR10\_crap**, G-protein alpha subunit, putative, expressed

Match to Query 5493: 2433.137656 from(609.291690,4+) rtinseconds(1510) index(3140)

Title: Locus:1.1.1.2740.3 File:"20170907\_Haiyun\_enriched.wiff"

Data file \\ad.unc.edu\cas\chemistry\share\Chem\_HicksGroup\Lab\_Members\Emily\2017 experiments\September

2017\Jones\20170907\_Haiyun\_enriched.mgf

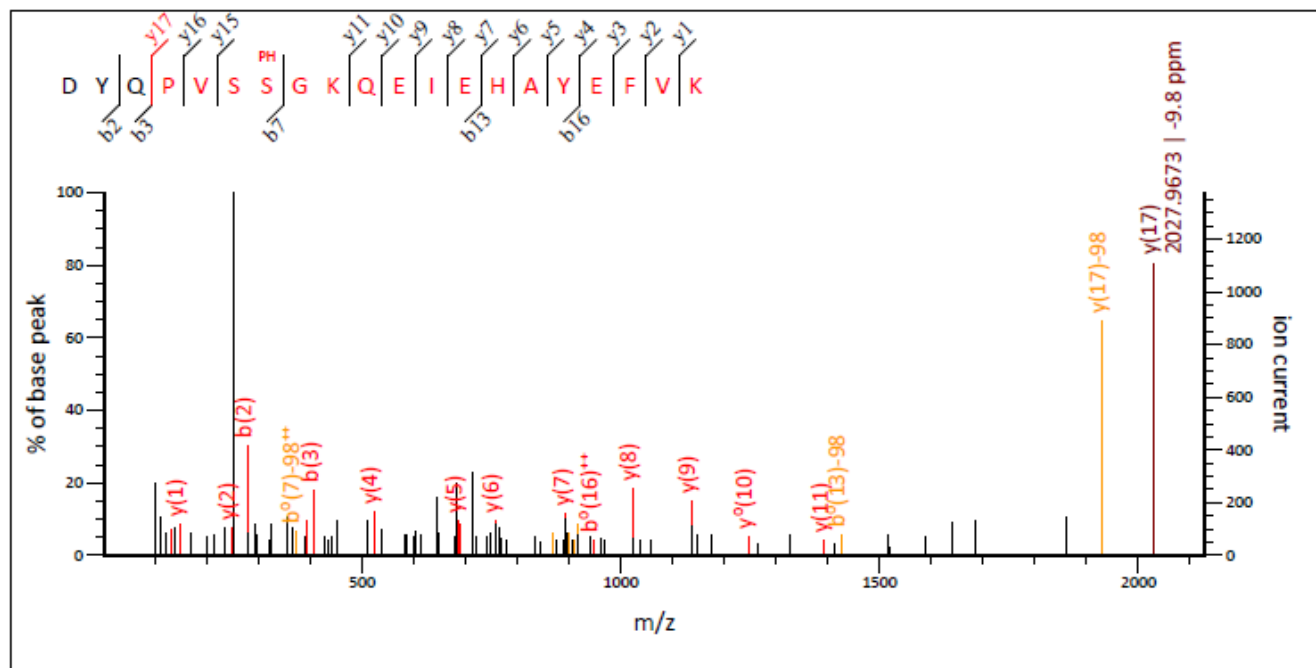

| Score | Mr(calc)  | Delta  | Sequence                             | Site Analysis     |
|-------|-----------|--------|--------------------------------------|-------------------|
| 38.5  | 2433.0889 | 0.0487 | <a href="#">DYQPVSSGKQEIEHAYEFVK</a> | Phospho S7 49.99% |
| 38.5  | 2433.0889 | 0.0487 | <a href="#">DYQPVSSGKQEIEHAYEFVK</a> | Phospho S6 49.99% |
| 25.2  | 2433.0889 | 0.0487 | <a href="#">DYQPVSSGKQEIEHAYEFVK</a> |                   |
| 2.3   | 2433.0354 | 0.1022 | <a href="#">LHSALSTWGVVQVMNHGITK</a> |                   |
